# Supplementary figures and images for: Profiling of Both Dipeptidyl Peptidase III and Renin Reveals Higher Mortality in Septic Shock
Source: Research Square preprint supplement (doi:10.21203/rs.3.rs-9596404/v1), 2026-05-21

**
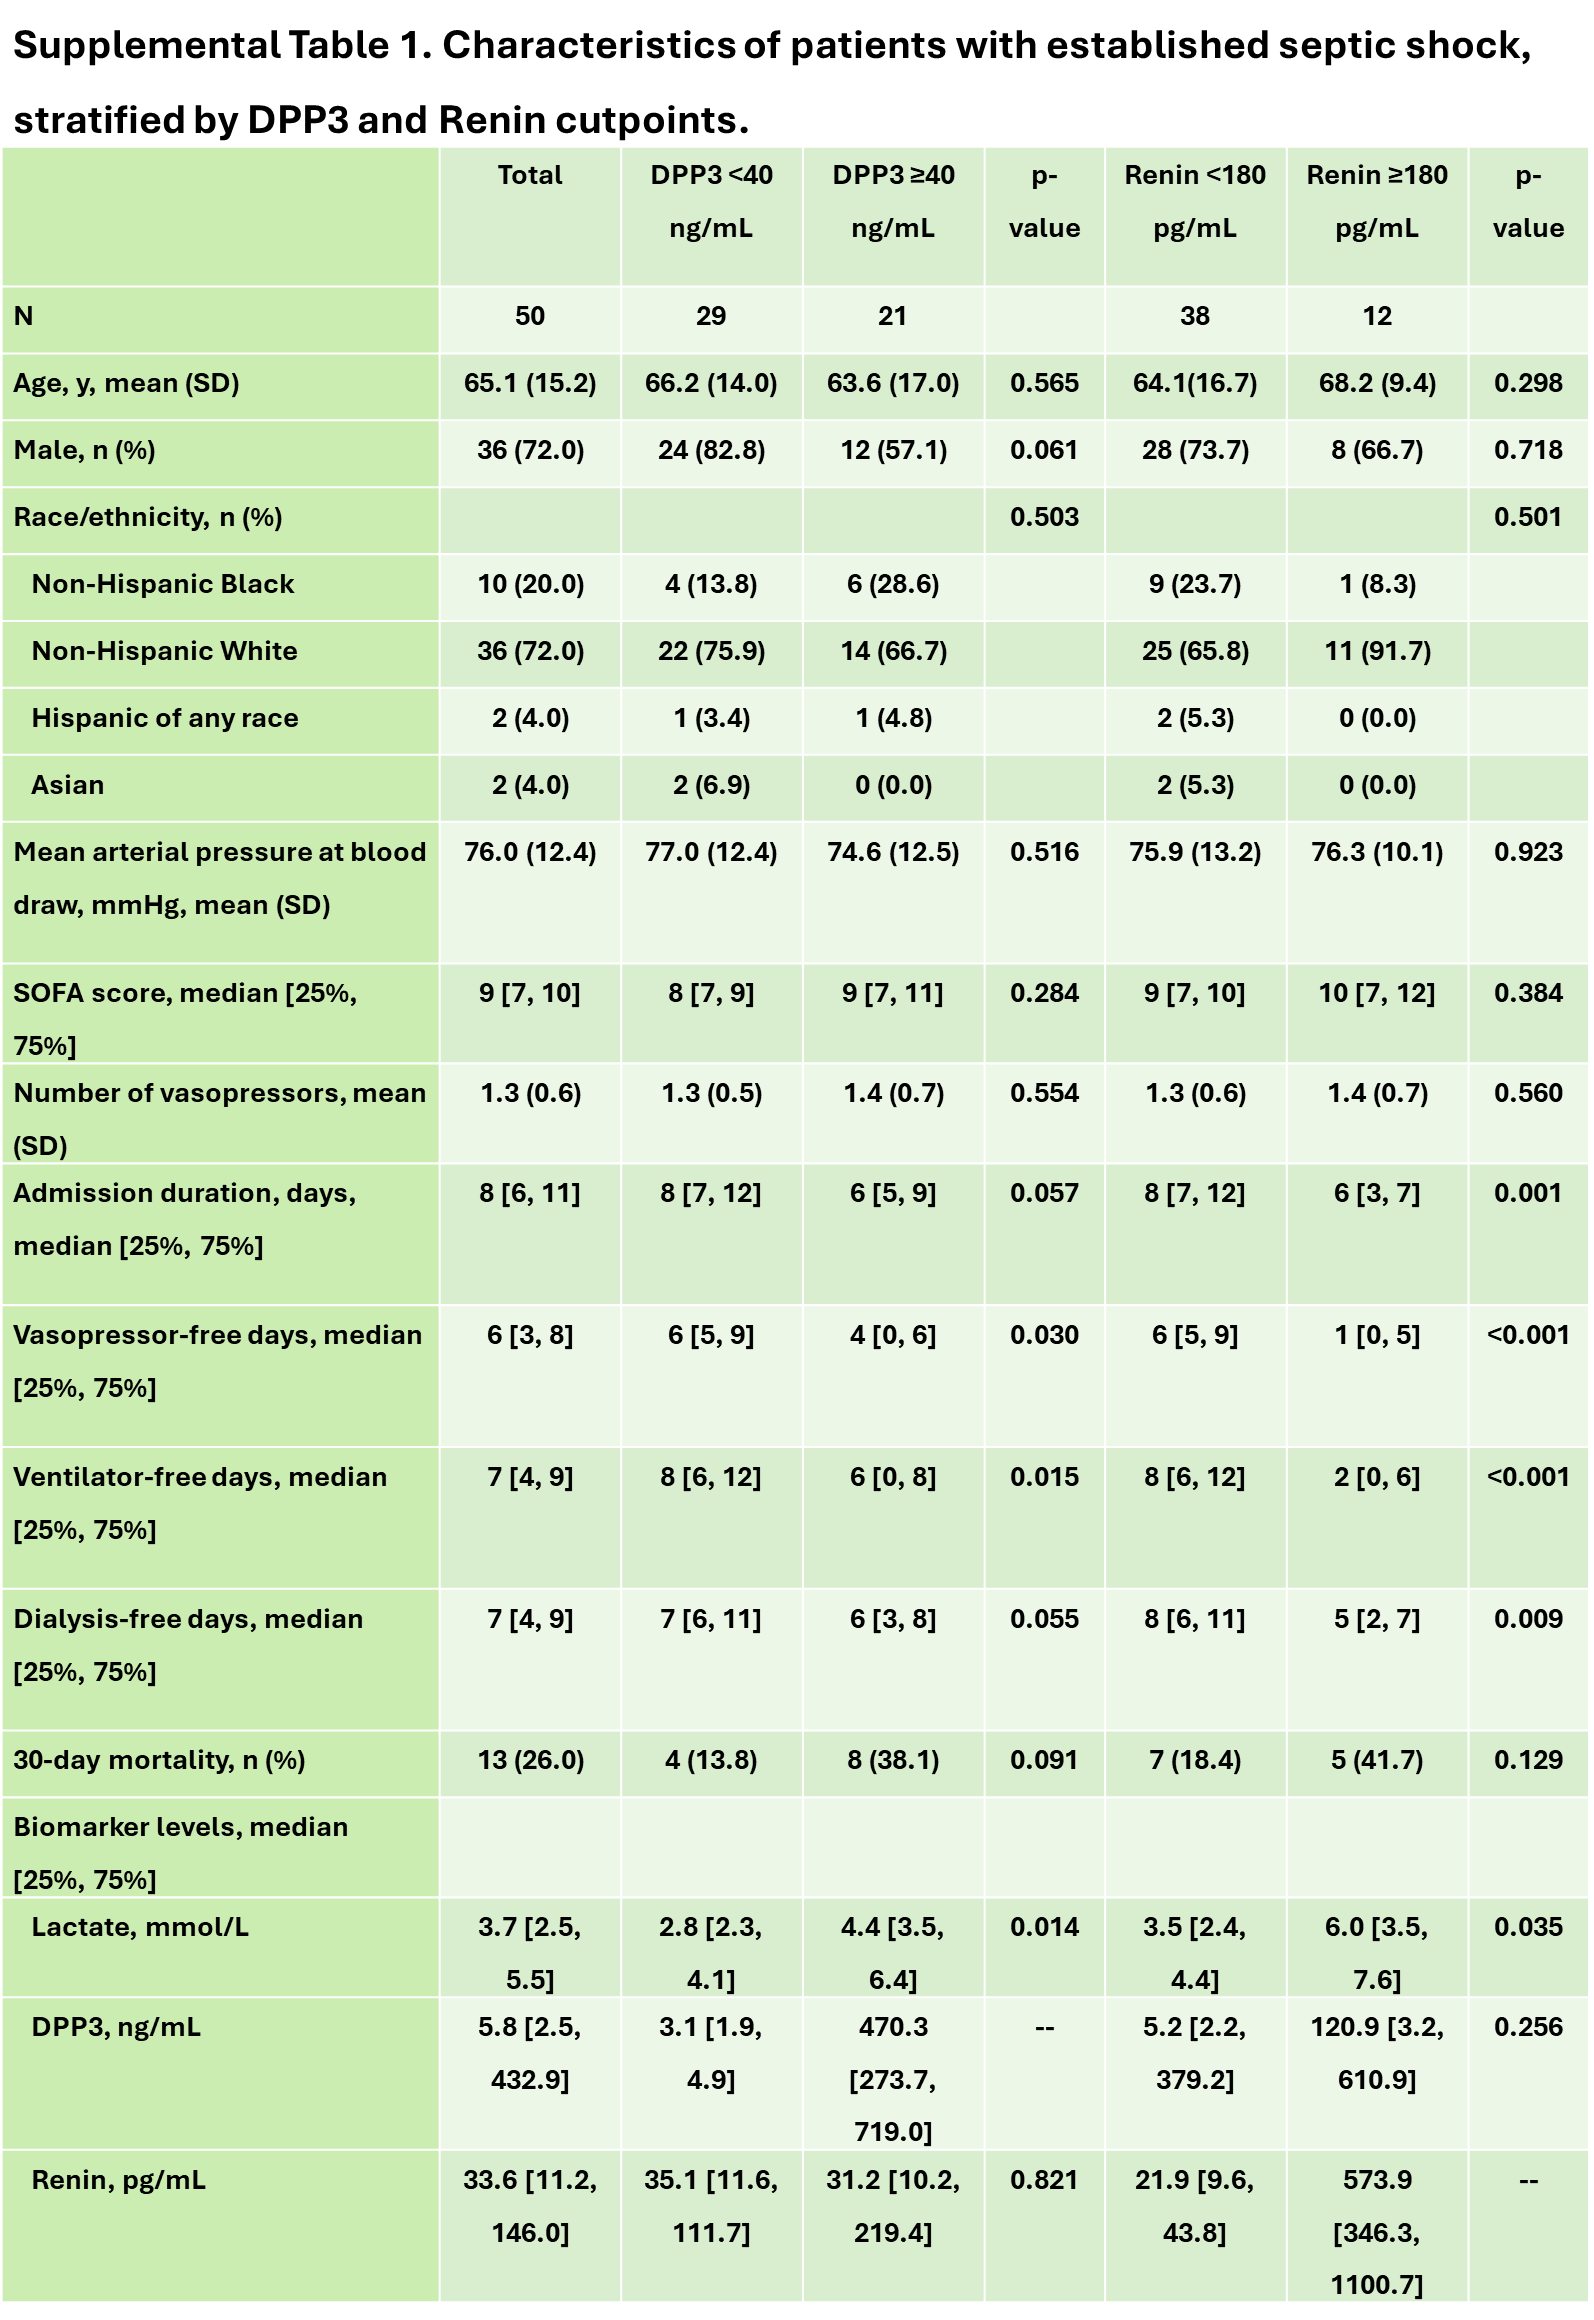
**

Supplement: Supplementary file 1 [file b74871c0d45b8e9b03d28f5c.docx]
